1 **Title:** Assessing placental maturity through histological and transcriptomic analyses in idiopathic  
2 spontaneous preterm birth.

3  
4 Heather M Brockway<sup>1\*</sup>, Helen N Jones<sup>2</sup>, William E Ackerman IV<sup>3</sup>, Irina A Buhimschi<sup>4</sup>, Catalin S  
5 Buhimschi<sup>3</sup>  
6 Suhas G Kallapur<sup>5</sup>, and Louis J Muglia<sup>1</sup>

7 <sup>1</sup> *Center for Preterm Birth, Cincinnati Children's Hospital Medical Center, Cincinnati OH 45229 USA*

8 <sup>2</sup> *Center for Fetal and Placental Research, Cincinnati Children's Hospital Medical Center, Cincinnati*  
9 *OH 45229 USA*

10 <sup>3</sup> *Department of Obstetrics and Gynecology, The Ohio State University, Columbus OH 43210 USA*

11 <sup>4</sup> *Center for Perinatal Research, Nationwide Children's Hospital, Columbus OH 43210 USA*

12 <sup>5</sup> *Divisions of Neonatology and Developmental Biology, David Geffen School of Medicine at the*  
13 *University of California, Los Angeles, CA, 90095, USA*

14

15 \*Corresponding author (Heather.Brockway@cchmc.org)

16

17 **Abstract:**

18 Preterm birth (PTB) is leading contributor to infant death in the United States and globally, yet the  
19 underlying mechanistic causes are not well understood. Previous studies have suggested a role for  
20 advanced villous maturity in both spontaneous and iatrogenic preterm birth. To better understand  
21 pathological and molecular basis of idiopathic spontaneous preterm birth (isPTB), we compared placental  
22 morphology and transcriptomic analysis in carefully phenotyped cohorts of PTB due to intraamniotic  
23 infection, isPTB, and healthy term placentae. Characteristic features of precocious placental villous  
24 maturation were uniquely demonstrated in isPTB placentae. Transcriptomic analyses revealed isPTB  
25 candidate genes. These include an upregulation of three IGF binding proteins (*IGFBP1*, *IGFBP2*, and

26 *IGFBP6*), supporting a role for IGF signaling in isPTB. Additional Gene Ontology analyses identified  
27 alterations in biological processes such as immunological activation and programmed cell death. Our data  
28 suggest that premature placental aging may contribute to the pathogenesis of isPTB and provide a  
29 molecular basis of this subset of cases of preterm birth.

30

## 31 **Introduction**

32 Every year, 1 million infants die from complications resulting from their birth before 37 completed  
33 weeks of gestation. In 2017, the incidence of prematurity in the United States was 9.6%<sup>1</sup> and worldwide  
34 incidences reached approaching 20% in some regions<sup>2</sup>. While preterm birth is a multifactorial syndrome,  
35 there are two primary classifications: spontaneous preterm birth (sPTB) and iatrogenic preterm birth as a  
36 result of fetal or maternal complications. Although risk factors have been identified the underlying  
37 molecular mechanisms of truly idiopathic spontaneous preterm birth (isPTB) remain unclear<sup>3</sup>.

38 The role, if any, of the placenta in isPTB is not clearly defined and remains under investigated.  
39 The placenta is a transient two-sided organ, providing a maternal/fetal interface, and its proper  
40 development and function is essential to a successful pregnancy outcome<sup>4</sup>. Placentation is the result of a  
41 highly complex web of molecular mechanisms originating from both the mother and the fetus, many of  
42 which are not yet fully understood even under healthy, normal conditions. Recent advances in placental  
43 transcriptomics have identified changes in gene expression and regulatory mechanisms across normal  
44 gestation<sup>5-8</sup>. Yet, transcriptomics of isPTB are currently limited.

45 During the third trimester of pregnancy, specific hallmarks of placental maturity are observed  
46 including an increased number of terminal villi, syncytial nuclear aggregates, and vasculosyncytial  
47 membranes<sup>9-11</sup>. Syncytial nuclear aggregates (SNA) are multi-layered aggregate of at least 10 syncytial  
48 nuclei extending out from the villous surface, that do not come in contact with other villi<sup>9</sup>. Terminal villi  
49 were defined as branched villi <80µm in diameter. Vasculosyncytial membranes are defined as regions in  
50 the villi where the fetal capillaries are immediately adjacent to areas of the syncytiotrophoblast free from

51 syncytial nuclei, thus are areas of direct diffusion<sup>11</sup>. These hallmarks are utilized in histological  
52 assessments to determine the maturity of the placenta, with the term placentas possessing the highest  
53 amounts of these hallmarks<sup>9-11</sup>. Previous histological studies of the villous trophoblast in isPTB (<37  
54 weeks GA) without intra-amniotic infection identified at least two distinct morphological phenotypes,  
55 with the significant majority of placental samples demonstrating advanced villous maturation (AVM). The  
56 AVM samples reflected all the hallmarks of a term placenta; the remaining samples had no hallmarks of  
57 AVM<sup>12,13</sup>. These data suggest there are multiple subclasses of isPTB: those with or without infection and  
58 those with or without AVM. Thus, identifying and assessing placental maturity through histological and  
59 transcriptomic studies is necessary to define aberrant molecular mechanisms underlying the placental  
60 pathophysiology associated with subtypes of isPTB. The objective of this study was to identify  
61 transcriptomic signatures of placental maturity in a histologically defined cohort of idiopathic spontaneous  
62 preterm births.

63

## 64 **Results**

### 65 *Study Characteristics*

66 Maternal and fetal characteristics for the three different pregnancy outcomes included in this study are  
67 presented in Table 1. Significant differences were observed in gestational age and fetal weights between  
68 intra-amniotic infection (IAI) and isPTB samples compared to the term samples ( $P < 0.001$ ). Among the  
69 isPTB samples, two of neonates were small for gestational age (SGA) with a fetal weight less than the  
70 10<sup>th</sup> percentile. Within the IAI samples, only one neonate was SGA. All term births for which there was  
71 fetal weight available ( $n=9$ ) were appropriate for gestational age.

72

### 73 *Assessment of advanced maturity in isPTB villi*

74 Stereological assessment identified no significant differences between the isPTB and term samples in  
75 number of syncytial nuclear aggregates (SNAs) or terminal villi per high powered field (villi < 80 $\mu$ m in

76 diameter) (Table 2; Figure 1A-C, F-G). One isPTB case could not be classified as there was no sample  
77 left to assess morphology. There was a trend towards no significance between the IAI and term samples  
78 in the numbers of terminal villi observed ( $P=0.078$  Table 2) with no differences observed in the number  
79 of SNAs between IAI and term samples. Vasculosyncytial membrane counts were significantly reduced  
80 in IAI samples compared to isPTB and term samples ( $P=0.001$  Table 2 and Figure 1). Perivillous fibrin  
81 deposits were observed in each of the sample types (Figure 1).

82

### 83 *RNA Sequence results*

84 All fastq files passed initial quality control assessment in FASTQC. A total of 1,246,073,145 unpaired  
85 reads were generated for the 31 samples and 761,182,139 reads (61.08%) were successfully aligned once  
86 to the human genome GRCh38 (Supplemental Tables S1 and S2). As there are multiple paralogous gene  
87 families expressed in the placenta, we opted not to include reads that mapped multiple times in our final  
88 analyses. Further quality control assessments were completed to examine sequence quality per sample  
89 (Supplemental Figure 2 A-C).

90

### 91 *Identification of differentially expressed genes*

92 Due to the origin of the samples and inclusion of a pre-existing dataset, we performed multiple  
93 quality control assessments, including principle component analyses (PCA) to identify potential batch  
94 effects (Supplemental Figure S1). We did not observe any significant batch effects and thus, did not  
95 remove or control for them in subsequent tests for differential gene expression. The IAI samples were  
96 entirely female in origin and had a small sample size; therefore, so we did not control for any covariate  
97 factors such as fetal sex as it could be potentially biased. We performed differential gene expression  
98 testing in three pairwise comparisons: IAI compared to term births, isPTB compared to IAI birth, and  
99 isPTB compared to term births. Genes were considered significant with an adjusted P-value of  $<0.1$  and  
100 absolute  $\log_2$  fold-change  $>1.5$  (Figure 2A, all significant genes labeled red). We identified 160

101 significant genes in IAI verses term, with 117 upregulated and 43 downregulated. In the isPTB verses  
102 IAI comparison, we identified a total of 94 significant genes with 62 upregulated and 32 downregulated.  
103 Lastly, in the isPTB verses term comparison, we identified 158 significant genes with 157 upregulated  
104 and only 2 genes downregulated (Supplemental Tables S3,S4 and S5)

105

106

### 107 *Categorization of maturation, gestation, and isPTB candidate genes*

108 Differently expressed genes alone are not enough to identify transcriptomic signatures due to  
109 advanced maturation, gestational age, infection, or isPTB pathophysiology. Therefore, to identify  
110 candidate genes in each of these categories, we intersected the significant genes, both upregulated and  
111 downregulated, from each of the differential gene expression comparisons (Figure 2B). Genes categorized  
112 as infection (n=37) are represented in the intersection of IAI vs term and isPTB vs term. A previous study  
113 by Ackerman et al<sup>14</sup> using a subset of these data profiled genes and pathways involved in intra-amniotic  
114 infection and we did not further explore these results. We did confirm that several of the genes they  
115 identified in their study (*ACTA1*, *FUT9*, *MPO*, *SI00A12*) were present in this category in our results.  
116 Gestational age genes (total n= 123) are represented by the intersection of IAI vs term and isPTB vs term  
117 (n=11) and the genes exclusive to IAI vs term (n=112) (Figure 2B). Maturation genes (total n= 186) are  
118 represented by the intersection of isPTB vs IAI (n=18) and the genes exclusive to isPTB v IAI (n=39) and  
119 isPTB vs term (n=129) (Figure 2B).

120 To further refine our analysis, we compared the expression pattern of each candidate genes in each  
121 group across all three differential expression datasets (Figure 2C). To detect a maturation signal, we  
122 examined the 186 maturation candidate genes and identified those differentially expressed in the isPTB v  
123 IAI data with an absolute log<sub>2</sub> fold change of >1.5. We then compared their expression across the other  
124 two differential expression datasets to identify genes that a similar pattern of expression in term v IAI,  
125 but were not differentially expressed in isPTB v term. 21 genes met these criteria and are represented in a

126 heatmap (Figure 2; Table 3). Of these genes, 10 were upregulated and 11 were downregulated. We also  
127 were able to identify 13 of maturation genes which demonstrate differences in expression in isPTB vs IAI  
128 and term vs IAI similar to the maturation signal candidates; however, they are also differentially expressed  
129 in the isPTB vs term data (Figure 2; Table 3). Within this subset of maturation genes, 10 genes were  
130 upregulated and 4 were downregulated. Lastly, we were able to identify isPTB specific genes from the  
131 remaining maturation candidates by identifying genes in the isPTB vs term with an absolute log<sub>2</sub> fold  
132 change of 1.5 and with a similar expression pattern in isPTB v IAI and the opposite expression or no  
133 difference in expression in term vs IAI (n=141) (Figure 3 and Table 4). Of these genes, only 2 were  
134 downregulated with the remaining 139 genes being upregulated.

135 We identified gestational age candidates using the same approach, first identifying genes in the  
136 IAI vs term data with an absolute log<sub>2</sub> fold change of > 1.5 as this represents the greatest difference in  
137 gestational ages between our samples. We then compared the expression changes in isPTB v term and  
138 isPTB v IAI (Figure 2). While we did observe differences in expression in the isPTB vs IAI comparison,  
139 this is likely due to the differences in gestational ages of these samples (isPTB 29-36 wks v IAI 25-31 wks).  
140 Using this approach, we identified 32 candidate genes with 29 of the genes upregulated and 3  
141 downregulated (Figure 2; Supplemental Table S6).

142

### 143 *Functional classification and enrichment analyses for candidate genes*

144 We assessed enrichment in each of the candidate gene categories. There was no enrichment for  
145 Reactome pathways or GO terms in either of the maturity categories. However, there was enrichment in  
146 the gestational age candidates for cellular components related to the extracellular region (GO:0005576).  
147 These included 19 genes including receptors and ligands for the WNT signaling pathway, cell  
148 proliferation, and inflammatory response. The candidate genes associated with isPTB physiopathology  
149 had significant pathway enrichment including the IGF signaling pathway including three IGF binding

150 proteins (Table 7). Furthermore, the isPTB candidate genes were enriched for GO terms associated with  
151 immunity, signaling, and regulation of blood flow (Table 5 and Supplemental Tables S7 and S8).

152 In addition to the enrichment analyses, we also performed functional classifications on all the  
153 candidate genes to identify additional pathways and functions (Supplemental Figures S3 and S4). The  
154 maturation candidate genes were divided into two subsets: those that showed no differences in expression  
155 (signal) between isPTB and term, and a subset that were expressed more in isPTB than term (drivers).  
156 While the candidate genes shared many biological processes, notable differences occur between the  
157 groups specifically within the metabolic processes (GO:0008152), immune system  
158 processes(GO:0002376), and locomotion (GO:0040011) (Supplemental Figure S3).

159

## 160 **Discussion:**

161 The numerous subclassifications of preterm birth coupled with a limited understanding of the  
162 placental role in birth timing, have made identifying the etiological underpinnings of this devastating  
163 pregnancy outcome exceedingly difficult. We previously attempted to identify molecular signatures of  
164 spontaneous PTB using publicly available microarray data<sup>15</sup> and identified several placental genes and  
165 pathways associated with spontaneous preterm birth. However, those analyses lacked complete covariate  
166 information, appropriate gestational age controls, and were on mixed array platforms. In this study, we  
167 overcame those limitations and combined transcriptome analyses with histological assessment of matched  
168 placental samples to assess maturity in order to elucidate the placental role in isPTB, and to identify a  
169 placental molecular signature associated with isPTB.

170 Morgan et al. hypothesized that placental maturity, as assessed by markers of villous maturation,  
171 and not infection may be the leading cause of both idiopathic and iatrogenic PTB<sup>12,13</sup>. However, only one  
172 other study has linked placental maturity to the molecular etiology of PTB. A recent study by Leavey et  
173 al. of placental maturity in pre-eclampsia (a common reason for iatrogenic preterm delivery) identified  
174 morphological and molecular similarities between PE placentas with advanced villous maturity (AVM)

175 and normal term placentas<sup>16</sup>. Furthermore, they demonstrated that AVM placentas had a shift in their  
176 molecular signature and thus appeared older than their actual gestational age at delivery. These data along  
177 with Morgan et al.<sup>13</sup> suggest a role for the placenta in PTB etiology, a role where AVM is potentially  
178 affecting placental output through increased terminal villi, more syncytiotrophoblast, and thus an increase  
179 in placental output in terms of secreted proteins and exosomes earlier in gestation. If placental output has  
180 a role in modulating birth timing, the AVM placentas regardless of whether they are idiopathic or  
181 iatrogenic may lead to PTB. These data also indicate that placental maturity and its associated molecular  
182 signatures may have a profound impact on how we utilize placental output to assess adverse pregnancy  
183 outcomes such as PTB and its subclassifications in the clinical setting.

184 In our current study, all isPTB placentas demonstrated changes in villous structure consistent  
185 with AVM along with peri-villous fibrin deposition with no significant differences observed compared to  
186 term births despite being delivered on average 5.8 weeks before term. This is consistent with previous  
187 histological observations<sup>12,13</sup> which defined AVM as an increase in syncytial nuclear aggregates and  
188 terminal villi. Our assessment of vasculosyncytial membranes and fibrin deposition further strengthens  
189 the interpretation of advanced placental maturity in isPTB. In contrast, the IAI samples demonstrated  
190 structural hallmarks appropriate for their gestational maturity and age, as previous analysis of those  
191 samples concluded acute inflammation was the likely cause of their preterm delivery<sup>14</sup>. Given that control  
192 tissues from 20-36 weeks of gestation are not available due to the ethics of mid-late-gestation sampling  
193 or termination, placentas from IAI were the most appropriate controls that we could utilize for our  
194 transcriptomic analyses. Placentas in both the isPTB and IAI groups demonstrated perivillous fibrin  
195 deposition which may impact the amount placental surface area available for nutrient and oxygen  
196 exchange, leading to reduced fetal growth and SGA neonates. However, only three neonates were  
197 observed to be SGA, two were isPTB and one IAI; therefore, we do not believe the fibrin deposition is  
198 problematic or affecting placental function.



199           One of the primary obstacles in utilizing placental samples for transcriptomics has always been  
200 the lack of appropriate gestational aged (GA) control placentas. In most studies, GA matched placentas  
201 are not normal and thus are not suitable controls. As Ackerman et al<sup>14</sup> have shown, the most parsimonious  
202 cause for the preterm birth in the IAI samples is infection, not adverse placental maturity or even placental  
203 insufficiency, making them the most appropriate controls. As such, we were able to then use them to  
204 conduct three pairwise comparisons to identify candidate genes that represented differences in maturity,  
205 gestation, and isPTB specific to their expression patterns.

206           The primary goal of this study was to determine if a molecular signature of maturity and isPTB  
207 could be identified from placentas demonstrating AVM. In our preliminary analyses, we classified  
208 significantly differentially expressed genes into gestational age, maturity, and isPTB candidates. Two  
209 maturity candidate genes, keratin 24 (*KRT24*) and shisa like 1 (*SHISALI*) were significantly upregulated  
210 between the isPTB and term samples compared to IAI samples. Keratins are intermediate filament proteins  
211 expressed in epithelial cells that have a variety of roles in the cell including providing structural support  
212 to the cell and cellular mechanics<sup>17</sup>. While KRT24 is similar to other type I keratins, is found in epithelial  
213 cells, and is believed to be a terminal differentiation marker. Its increased expression induces senescence,  
214 autophagy, and apoptosis<sup>18</sup>. Given that KRT24 localizes to the villous trophoblasts<sup>19</sup>, the increase in  
215 terminal villi observed in isPTB likely accounts for increase expression. *SHISALI* function is currently  
216 unknown, but the shisa family of genes encode transmembrane proteins with roles in development as  
217 wingless and INT1 (WNT) and fibroblast growth factor (FGF) signaling antagonists<sup>20</sup> and myocyte  
218 fusion<sup>21</sup>.

219           The two most downregulated candidates genes for maturity were cellular retinoic acid binding  
220 protein 1 (*CRABPI*) and lysosomal associated membranes protein family member 5 (*LAMP5*). *CRABPI*  
221 is an epigenetically modulated tumor suppressor gene with a known role in retinoic acid signaling in the  
222 placenta<sup>22</sup>. Its downregulation in the isPTB and term samples could indicate altered retinoic acid transport  
223 and metabolism in fetal tissues<sup>22,23</sup>. *LAMP5* is a recently identified member of the lysosomal associated

224 membrane protein gene family<sup>24</sup>. Unlike the other broadly expressed family members, LAMP5 expression  
225 has only been observed in the brain, dendritic cells, and placental trophoblasts<sup>19</sup>. LAMP proteins are  
226 involved in autophagy and lysosomal formation and transport<sup>25</sup>. While we did not identify any specific  
227 enrichment for pathways in the maturity candidate gene list, functional analyses revealed WNT signaling  
228 and transforming growth factor beta (TGF $\beta$ ) signaling as potential pathways of interest. We also  
229 examined the biological processes represented by the maturation genes although none were significantly  
230 enriched. Given that various bioprocesses these genes represent are active in placental trophoblasts, further  
231 investigations to refine their roles in placental development and maturation longitudinally are warranted.

232 For the gestational age candidates, growth regulating estrogen receptor binding 1 (*GREB1*) and  
233 dickkopf WNT signaling pathway inhibitor (*DKK1*) are upregulated in isPTB and IAI compared to term  
234 while carboxypeptidase X, M14 family member (*CPXM2*) is most downregulated gene. GREB1 appears  
235 to be localized to the fetal endothelial cells<sup>19</sup> and is known to localize to maternal endometrial epithelial  
236 cells<sup>26</sup>. GREB1 function has not been studied in fetal villous physiology; however, in endometriosis<sup>26</sup> and  
237 more recently in decidualization<sup>18</sup>. *DKK1*, a WNT signaling antagonist, was also identified as a highly  
238 upregulated gene in our array study; however, it was not significant. While previous studies have focused  
239 on its role in the decidua, we show that DKK1 localized to the syncytiotrophoblast in isPTB with a  
240 reduction in expression in term samples as expected from the expression data. It is known that WNT  
241 signaling, is essential to placental development acting through trophoblast proliferation and inhibition of  
242 apoptosis<sup>27,28</sup>. It has been theorized that aberrant DKK1 expression, especially upregulation in iatrogenic  
243 PTB samples, could be associated with etiology or pathophysiology<sup>28,29</sup>. However, these studies as well  
244 as our previous transcriptomics study lack appropriate gestational age controls. Given our data in this  
245 study, we posit that the difference in *DKK1* expression between PTB samples is due to gestational age  
246 rather than pathology. Yet, as it does have such a strong expression pattern between gestational ages, it is  
247 worth further study to determine its precise role in normal placental maturation.

248           Within the isPTB candidate genes, we observed significant enrichment for genes within the IGF  
249 (insulin like growth factor) signaling pathway, specifically IGF binding proteins: *IGFBP1*, *IGFBP2*,  
250 *IGFBP6* (Tables 4 and 5). IGFBPs bind to IGF1 and IGF2 modulating their bioavailability to activate the  
251 IGF signaling pathway<sup>30</sup>. IGFBP1 was thought to be primarily expressed in the decidua, but we and  
252 others<sup>31</sup> have shown that it is present in the syncytiotrophoblast (Figure 4). IGFBP2 has been shown to be  
253 expressed in the placental villi via qPCR and western blotting<sup>31</sup> but its specific localization is not known.  
254 IGFBP6 is expressed in the villous trophoblasts<sup>19</sup>. Upregulation of each of these genes indicates potential  
255 changes in the IGF signaling that could alter the development of the placenta. The IGF signaling pathway  
256 is associated with a plethora of biological processes essential to placental growth including trophoblast  
257 migration, nutrient sensing and transport, metabolism, and proliferation through the activation of the  
258 mitogen activated protein kinase (MAPK), extracellular signal regulated (ERK), and phosphoinositide 3-  
259 kinase/mammalian target of rapamycin (PI3K/mTOR) pathways which are downstream of the IGF1R<sup>32-</sup>  
260 <sup>34</sup>. Previous studies have demonstrated IGF1 and 2 regulate trophoblast physiology in the developing  
261 placenta; therefore, the aberrant upregulation of these specific *IGFBPs* could alter IGF signaling and  
262 growth of the placenta via trophoblast differentiation and metabolism<sup>33,34</sup>. While much of the study of IGF  
263 signaling has been focused on fetal growth, we only observed two cases of SGA in our isPTB samples,  
264 with the remaining cases at or above the 20<sup>th</sup> percentile for their gestational age, suggesting the alteration  
265 in IGF signaling modulating gestational length is not affecting fetal growth. Furthermore, it is important  
266 to note that both IGFBP2 and IGFBP6 have roles independent of the IGF signaling including integrin  
267 binding modulation through nuclear factor kappa light chain enhancer of activated B cells (NFκB)  
268 signaling<sup>35</sup>, inhibition of angiogenesis<sup>36</sup> and could also be modulating additional biological processes  
269 outside the IGF signaling pathway.

270           In our previous PTB transcriptomics study<sup>15</sup>, we identified *IGFBP1* as an upregulated but non-  
271 significant gene of interest and PI3K signaling pathway as a significant network potentially predictive of  
272 PTB. These data along with the current findings support a role for IGF signaling in isPTB independent of

273 aberrant fetal growth. IGFBP1 has been further linked to preterm birth as a marker of cervical ripening  
274 through analysis of vaginal fluids<sup>37,38</sup>. While these studies focused on the role of IGFBP1 in infection with  
275 premature rupture of membranes (PROM) or fetal growth syndromes suggesting a role for circulating  
276 decidual derived IGFBP1, the apparent upregulation of *IGFBP1* in the syncytiotrophoblast as observed in  
277 this study (Figure 4) suggests origin of circulating IGFBPs are not limited to the decidua and their role in  
278 isPTB requires further investigation.

279 Further Gene Ontology (GO) analyses of the isPTB candidate genes revealed enrichment for  
280 cellular components including the T-cell receptor complex, immunological synapse and various  
281 membrane associated complexes. GO enrichment for biological processes included programmed cell  
282 death, T-cell activation, and cellular defense response among others. Taken together these data suggest an  
283 enrichment for an immunological trigger of apoptosis or autophagy; however, it is unclear if this is  
284 trophoblastic in origin or a result of alterations in the villous stroma. We did not identify any enrichment  
285 for GO terms or pathways in the maturity, we did identify cellular components of interest in the gestational  
286 age candidates including several members of the WTN signaling subpathways along with cell proliferation  
287 and inflammatory response signals all of which require further analyses for their role in birth timing. We  
288 also performed functional classifications for biological processes and pathways to determine differences  
289 and similarities between the different candidate classifications. Interestingly, we observed the candidates  
290 shared numerous biological pathways, but differed in three specific areas, locomotion, metabolic, and  
291 immune processes.

292 In summary, this is the first study to associate placental morphological phenotypes and genome-  
293 wide transcriptome signatures in isPTB. Our work has shown not only a role for the placenta in isPTB,  
294 but that accelerated placental maturity directly affects pregnancy outcomes. The similarities of the isPTB  
295 and term placentas on both the morphological and molecular levels suggests a precocious maturation  
296 phenotype in isPTB, further demonstrating the need to precisely identify the subclassifications of  
297 spontaneous preterm birth. Identifying the molecular signatures related to the pathophysiological

298 differences and similarities between isPTB and term placentas will allow us to gain insight birth timing  
299 and potentially develop meaningful clinical therapeutic interventions.

300

## 301 **Materials and Methods**

### 302 *Study Population*

303 This study was approved by the Cincinnati Children's Hospital Medical Center institutional review board  
304 (#IRB 2013-2243, 2015-8030, 2016-2033). De-identified term (n=9) and idiopathic spontaneous preterm  
305 (n=8) placental villous samples and patient information were obtained from the following sources: The  
306 Global Alliance to Prevent Prematurity and Stillbirth (GAPPS) in Seattle Washington USA, the Research  
307 Centre for Women's and Infant's Health (RCWIH) at Mt Sinai Hospital Toronto Canada, and the  
308 University of Cincinnati Medical Center (UCMC). Inclusion criteria included: maternal age 18 years or  
309 older, singleton pregnancies with either normal term delivery (38-42 weeks gestation) or preterm delivery  
310 (29-36 weeks gestation) without additional complications other than idiopathic spontaneous preterm.  
311 Utilizing an RNA sequencing power calculation from<sup>39</sup>, it was determined that 10-15 transcriptomes for  
312 this particular study. Thus, previously published RNA sequence based, placental villous transcriptomes  
313 (GEO GSE73714 term=5, isPTB=5, inter-amniotic infection=5) were also utilized<sup>14</sup>. Birth weight  
314 percentiles were estimated using the WHO weight percentiles calculator<sup>40</sup> with an US average birth weight  
315 of 3400gm<sup>41</sup>.

316

### 317 *Transcriptome Generation*

318 All placental samples from GAPPS, RCWIH, and UCMC which were collected within 60 minutes of  
319 delivery and snap frozen prior to biobanking. Total RNA was prepared from placental villous samples  
320 thawed in RNAIce Later (Invitrogen) as per manufacturer instructions. Total RNA was isolated using the  
321 RNAeasy Mini Kit (Qiagen). 50-100 µg of total RNA was submitted to the University of Cincinnati  
322 Genomics, Epigenomics and Sequencing Core for RNA quality assessment and sequencing. Long RNA

323 total libraries were generated using a RiboZero Kit (Illumina) and sequencing was run on a Illumina High  
324 Seq 2100 system to generate single end 50bp reads at a depth of 50 million reads. Details on the collection  
325 of placental samples and generation of transcriptomes from GSE73714 can be found here<sup>14</sup>.

326

### 327 *RNA-sequence Analyses*

328 To facilitate RNA sequence analyses, a local instance of the Galaxy<sup>42</sup> was utilized with the following  
329 tools: FASTQC (Galaxy v0.71)<sup>43</sup>, TrimGalore! (Galaxy v0.4.3.1)<sup>44</sup>, Bowtie2 (Galaxy v2.3.4.1)<sup>45</sup>, and  
330 FeatureCounts (Galaxy v1.6.0.3)<sup>46</sup>. The quality of the raw fastq files was assessed with FASTQC and with  
331 adapters subsequently trimmed with TrimGalore. Trimmed sequences were then aligned to the University  
332 of California Santa Cruz (UCSC) human genome hg38 using Bowtie2. FeatureCounts was used to  
333 generate total read counts per gene and to generate a count matrix file to be used in differential gene  
334 expression analyses.

335

### 336 *Differential Expression Analyses*

337 After annotation, all non-coding transcripts were removed from the count matrix. Counts per gene were  
338 calculated and genes with less than 70 counts total across all samples were removed. The count data was  
339 then normalized using the counts per million (CPM) method to allow for various quality control analyses  
340 to ensure the data was ready for differential expression testing (Supplemental Figure S1). Differential  
341 expression tests were conducted in EdgeR (Empirical Analyses of Digital Gene Expression in R)<sup>47</sup> on  
342 only protein coding genes. Within EdgeR, data were normalized using TMM (trimmed means of m  
343 values)<sup>48</sup> to account for differences in library sizes. Comparisons for differential expression testing were  
344 as follows: IAI compared to term births, isPTB compared to term births, and isPTB compared to IAI  
345 births. Multiple corrections testing was performed using the Benjamini Hochberg method with a Q value  
346 of <0.05. Venny v2.0<sup>49</sup> was utilized to generate Venn diagrams and identify candidate genes for  
347 maturation, gestational age, and isPTB. Heatmaps were generated in Prism v7 (GraphPad).

348

349 *Pathway and Gene ontology Analyses*

350 Significant genes were divided into upregulated and downregulated categories then entered into the  
351 Panther Pathway DB<sup>50</sup> for statistical overrepresentation analyses for Reactome Pathways and gene  
352 ontology (GO). Fisher's Exact tests were used to determine significance and Bonferroni correction for  
353 multiple comparisons. Pathways were considered significant if they had an adjusted p-value <0.05 and  
354 enrichment score of >4.

355

356 *Histology and Immunohistochemistry (IHC)*

357 Serial sections were stained with Hematoxylin and Eosin (H&E) and assessed for placental maturity as  
358 described below. Immunohistochemistry was performed as previously published<sup>9</sup>. Briefly, all slides were  
359 incubated 95°C target retrieval solution for 30 minutes then washed in deionized water. Slides were then  
360 incubated in 3% hydrogen peroxide for 10 minutes followed by blocking in 10% normal goat serum +1%  
361 bovine albumin for 60 minutes. Primary antibodies generated in rabbit sera were diluted in phosphate  
362 buffered saline (PBS): DKK1 (1:20, GeneTex GTX40056) and IGFBP1 (1: 50, GeneTex GTX31149).  
363 Slides were incubated overnight at 4°C washed and incubated with biotinylated secondary antibody (anti-  
364 rabbit) for 60 minutes. Antibody binding was detected using DAB and slides were counterstained with  
365 hematoxylin. All slides were imaged on a Nikon Eclipse 80i microscope.

366

367 *Clinical definitions.* Gestational age was established based on last menstrual period confirmed by an  
368 ultrasonographic examination prior to 20 weeks<sup>51</sup>. IAI was established based on analysis of the amniotic  
369 fluid retrieved in sterile conditions by trans-abdominal amniocentesis. Amniotic fluid infection was  
370 established by a positive Gram stain or a positive microbial culture result<sup>52</sup>. Preterm birth was defined as  
371 delivery of the neonate <37 weeks GA<sup>53</sup>. Idiopathic preterm birth was established absent IAI and  
372 histologic inflammation of the placenta and fetal membranes as assessed by a clinical pathologist<sup>54</sup>.

373

374 *Morphological Assessment of Placental Maturity*

375 Syncytial nuclear aggregates (SNA) were defined as a multi-layered aggregate of at least 10 syncytial  
376 nuclei extending out from the villous surface but not in contact with other villi <sup>9</sup>. Terminal villi were  
377 defined as branched villi <80µm in diameter. Vasculosyncytial membranes are defined in<sup>11</sup>. Fibrin  
378 deposition was quantified by a score of 0-3 with where 0 was no fibrin observed and where 3 was the  
379 majority of the field containing fibrin. SNAs, terminal villi, and vasculo-syncytial membranes were  
380 counted manually and fibrin deposition was scored in 20 high powered fields (hpf) by two blinded  
381 reviewers.

382

383 *Statistical Analyses*

384 Data were analyzed in Prism7.0 (GraphPad). Data were evaluated for normality and non-parametric tests  
385 applied as appropriate. Non-parametric data are expressed as median and range and were analyzed by  
386 Kruskal-Wallis Test ANOVA with Dunn's Multiple Comparisons. Categorical data were analyzed using  
387 Fisher's Exact Test.

388

389 **Author Contributions**

390 HMB-Designed and preformed research, analyzed data, and wrote the paper

391 HNJ-Assisted in research design and advised data analyses, edited paper

392 WEA- provided RNA sequence data, advised on research design, edited paper

393 IAB - provided RNA sequence data, advised on research design, edited paper

394 CSB - provided RNA sequence data, advised on research design, edited paper

395 SGK-provided preterm birth samples, edited paper

396 LJM- Assisted in research design and advised data analyses, edited paper

397



## 398 **Acknowledgements**

399 The authors would like to express their gratitude to the patients who donated their placentas for research  
400 and to Pietro Presicce, Paranthaman Senthamarai Kannan, and Manuel Alvarez (Kallapur lab), GAPPS,  
401 and RCWIH for assisting us in obtaining the placental samples. Additionally, the authors thank the staff  
402 at the UC Genomics Core for their help generating the bulk of the transcriptomics data for this project.  
403 This work was supported by grants to LM from the March of Dimes Prematurity Research Center Ohio  
404 Collaborative Funding 07/13-6/18, The Bill and Melinda Gates Foundation: Systems Biology  
405 Approaches to Birth Timing and Prematurity OPP1113966 Funding 11/14-10/17, and the Eunice  
406 Kennedy Shriver National Institute of Child and Health & Human Development of the National  
407 Institutes of Health Award Number R01HD091527.

408

## 409 **Data Availability**

410 Data will be made available in GEO as per funding requirements upon manuscript acceptance for  
411 publication.

412

## 413 **Additional information**

414 The authors declare they have no competing interests.

415

416

417

418

419

## 420 **References:**

421

- 422 1 Dimes, M. o. March of Dimes Prematurity Report Card 2017. 1-4 (2017).
- 423 2 Blencowe, H. *et al.* Born too soon: the global epidemiology of 15 million preterm births. *Reprod*  
424 *Health* **10 Suppl 1**, S2, doi:10.1186/1742-4755-10-S1-S2 (2013).

- 425 3 Monangi, N. K., Brockway, H. M., House, M., Zhang, G. & Muglia, L. J. The genetics of preterm  
426 birth. Progress and promise. *Seminars in Perinatology*, 1-10, doi:10.1053/j.semperi.2015.09.005  
427 (2015).
- 428 4 Burton, G. J. & Fowden, A. L. The placenta: a multifaceted, transient organ. *Philosophical  
429 transactions of the Royal Society of London. Series B, Biological sciences* **370**, 20140066-  
430 20140066, doi:10.1098/rstb.2014.0066 (2015).
- 431 5 Mikheev, A. M. *et al.* Profiling gene expression in human placentae of different gestational ages:  
432 an OPRU Network and UW SCOR Study. *Reproductive sciences (Thousand Oaks, Calif.)* **15**, 866-  
433 877, doi:10.1177/1933719108322425 (2008).
- 434 6 Roberts, C. Placental transcriptome co-expression analysis reveals conserved regulatory programs  
435 across gestation. *BMC Genomics*, 1-13, doi:10.1186/s12864-016-3384-9 (2016).
- 436 7 Sitras, V., Fenton, C., Paulssen, R., Vårtun, Å. & Acharya, G. Differences in gene expression  
437 between first and third trimester human placenta: a microarray study. *PLoS ONE* **7**, e33294 (2012).
- 438 8 Winn, V. D. *et al.* Gene Expression Profiling of the Human Maternal-Fetal Interface Reveals  
439 Dramatic Changes between Midgestation and Term. *Endocrinology* **148**, 1059-1079,  
440 doi:10.1210/en.2006-0683 (2007).
- 441 9 Jones, H. N. *et al.* Hypoplastic left heart syndrome is associated with structural and vascular  
442 placental abnormalities and leptin dysregulation. *Placenta* **36**, 1078-1086,  
443 doi:10.1016/j.placenta.2015.08.003 (2015).
- 444 10 Loukeris, K., Sela, R. & Baergen, R. N. Syncytial knots as a reflection of placental maturity:  
445 reference values for 20 to 40 weeks' gestational age. *Pediatr Dev Pathol* **13**, 305-309,  
446 doi:10.2350/09-08-0692-OA.1 (2010).
- 447 11 Sankar, K. D., Bhanu, P. S., Kiran, S., Ramakrishna, B. A. & Shanthi, V. Vasculosyncytial  
448 membrane in relation to syncytial knots complicates the placenta in preeclampsia: a  
449 histomorphometrical study. *Anatomy & Cell Biology* **45**, 86-86,  
450 doi:10.5115/acb.2012.45.2.86 (2012).
- 451 12 Morgan, T. K. Placental Insufficiency Is a Leading Cause of Preterm Labor. *NeoReviews* **15**, e518-  
452 e525, doi:10.1542/neo.15-12-e518 (2014).
- 453 13 Morgan, T. K. *et al.* Placental villous hypermaturation is associated with idiopathic preterm birth.  
454 *Journal of Maternal-Fetal and Neonatal Medicine* **26**, 647-653,  
455 doi:10.3109/14767058.2012.746297 (2013).
- 456 14 Ackerman IV, W. E. *et al.* Comprehensive RNA profiling of villous trophoblast and decidua  
457 basalis in pregnancies complicated by preterm birth following intra-amniotic infection. *Placenta*  
458 **44**, 23-33, doi:10.1016/j.placenta.2016.05.010 (2016).
- 459 15 Paquette, A. G., Brockway, H. M., Price, N. D. & Muglia, L. J. Comparative transcriptomic  
460 analysis of human placentae at term and preterm delivery. *Biology of Reproduction* **98**, 89-101,  
461 doi:10.1093/biolre/iox163 (2017).
- 462 16 Leavey, K. *et al.* Gene markers of normal villous maturation and their expression in placentas with  
463 maturational pathology. *Placenta* **58**, 52-59, doi:10.1016/j.placenta.2017.08.005 (2017).
- 464 17 Jacob, J. T., Coulombe, P. A., Kwan, R. & Omary, M. B. Types I and II Keratin Intermediate  
465 Filaments. *Cold Spring Harbor Perspectives in Biology* **10**, a018275-018217,  
466 doi:10.1101/cshperspect.a018275 (2018).
- 467 18 Camden, A. J. *et al.* Growth regulation by estrogen in breast cancer 1 (GREB1) is a novel  
468 progesterone-responsive gene required for human endometrial stromal decidualization. *MHR:  
469 Basic science of reproductive medicine* **23**, 646-653, doi:10.1093/molehr/gax045 (2017).
- 470 19 Uhlen, M. *et al.* Proteomics. Tissue-based map of the human proteome. *Science* **347**, 1260419-  
471 1260419, doi:10.1126/science.1260419 (2015).
- 472 20 Pei, J. & Grishin, N. V. Unexpected diversity in Shisa-like proteins suggests the importance of  
473 their roles as transmembrane adaptors. *Cellular Signalling* **24**, 758-769,  
474 doi:10.1016/j.cellsig.2011.11.011 (2012).

- 475 21 Liu, Z., Wang, C., Liu, X. & Kuang, S. Shisa2 regulates the fusion of muscle progenitors. *Stem*  
476 *Cell Research* **31**, 31-41, doi:10.1016/j.scr.2018.07.004 (2018).
- 477 22 Marceau, G., Gallot, D., Lémyer, D. & Sapin, V. Vol. 75 97-115 (Elsevier, 2007).
- 478 23 Das, B. C. *et al.* Retinoic acid signaling pathways in development and diseases. *Bioorganic &*  
479 *Medicinal Chemistry* **22**, 673-683, doi:10.1016/j.bmc.2013.11.025 (2014).
- 480 24 David, A. *et al.* BAD-LAMP defines a subset of early endocytic organelles in subpopulations of  
481 cortical projection neurons. *Journal of Cell Science* **120**, 353-365, doi:10.1242/jcs.03316 (2007).
- 482 25 Schwake, M., Schröder, B. & Saftig, P. Lysosomal Membrane Proteins and Their Central Role in  
483 Physiology. *Traffic* **14**, 739-748, doi:10.1111/tra.12056 (2013).
- 484 26 Pellegrini, C. *et al.* The expression of estrogen receptors as well as GREB1, c-MYC, and cyclin  
485 D1, estrogen-regulated genes implicated in proliferation, is increased in peritoneal endometriosis.  
486 *Fertil Steril* **98**, 1200-1208, doi:10.1016/j.fertnstert.2012.06.056 (2012).
- 487 27 Meinhardt, G. *et al.* Wntless ligand 5a is a critical regulator of placental growth and survival.  
488 *Scientific Reports*, 1-14, doi:10.1038/srep28127 (2016).
- 489 28 Zhang, Z., Li, H., Zhang, L., Jia, L. & Wang, P. Differential expression of beta-catenin and  
490 dickkopf-1 in the third trimester placentas from normal and preeclamptic pregnancies: a  
491 comparative study. *Reproductive Biology and Endocrinology* **11**, 17, doi:10.1186/1477-7827-11-  
492 17 (2013).
- 493 29 Wang, X. *et al.* Wnt/ $\beta$ -catenin signaling pathway in severe preeclampsia. *Journal of Molecular*  
494 *Histology* **49**, 317-327, doi:10.1007/s10735-018-9770-7 (2018).
- 495 30 Firth, S. M. & Baxter, R. C. Cellular Actions of the Insulin-Like Growth Factor Binding Proteins.  
496 *Endocrine Reviews* **23**, 824-854, doi:10.1210/er.2001-0033 (2002).
- 497 31 Nawathe, A. R. *et al.* Insulin-like growth factor axis in pregnancies affected by fetal growth  
498 disorders. *Clinical Epigenetics*, 1-13, doi:10.1186/s13148-016-0178-5 (2016).
- 499 32 Forbes, K. & Westwood, M. The IGF Axis and Placental Function. *Hormone Research in*  
500 *Paediatrics* **69**, 129-137, doi:10.1159/000112585 (2008).
- 501 33 Forbes, K., Westwood, M., Baker, P. N. & Aplin, J. D. Insulin-like growth factor I and II regulate  
502 the life cycle of trophoblast in the developing human placenta. *American Journal of Physiology-*  
503 *Cell Physiology* **294**, C1313-C1322, doi:10.1152/ajpcell.00035.2008 (2008).
- 504 34 Hiden, U., Glitzner, E., Hartmann, M. & Desoye, G. Insulin and the IGF system in the human  
505 placenta of normal and diabetic pregnancies. *Journal of Anatomy* **215**, 60-68, doi:10.1111/j.1469-  
506 7580.2008.01035.x (2009).
- 507 35 Holmes, K. M. *et al.* Insulin-like growth factor-binding protein 2-driven glioma progression is  
508 prevented by blocking a clinically significant integrin, integrin-linked kinase, and NF- $\kappa$ B network.  
509 *Proceedings of the National Academy of Sciences* **109**, 3475-3480, doi:10.1073/pnas.1120375109  
510 (2012).
- 511 36 Bach, L. A. Recent insights into the actions of IGFBP-6. *Journal of Cell Communication and*  
512 *Signaling* **9**, 189-200, doi:10.1007/s12079-015-0288-4 (2015).
- 513 37 Kallioniemi, H., Rahkonen, L., Heikinheimo, O. & Paavonen, J. Early pregnancy vaginal fluid  
514 phosphorylated insulin-like growth factor binding protein-1 predicts preterm delivery. *Prenatal*  
515 *Diagnosis* **362**, 1-6, doi:10.1002/pd.4072 (2013).
- 516 38 Mešić Đogić, L., Mičić, D., Omeragić, F., Kovač, R. & Fazlagić, S. IGFBP-1 marker of cervical  
517 ripening and predictor of preterm birth. *Medicinski glasnik : official publication of the Medical*  
518 *Association of Zenica-Doboj Canton, Bosnia and Herzegovina* **13**, 118-124, doi:10.17392/856-16  
519 (2016).
- 520 39 Hart, S. N., Therneau, T. M., Zhang, Y., Poland, G. A. & Kocher, J.-P. Calculating Sample Size  
521 Estimates for RNA Sequencing Data. *Journal of Computational Biology* **20**, 970-978,  
522 doi:10.1089/cmb.2012.0283 (2013).
- 523 40 Hadlock, F. P., Harrist, R. B. & Martinez-Poyer, J. In utero analysis of fetal growth: a sonographic  
524 weight standard. *Radiology* **181**, 129-133, doi:10.1148/radiology.181.1.1887021 (1991).

- 525 41 Gardosi, J., Francis, A., Turner, S. & Williams, M. Customized growth charts: rationale, validation  
526 and clinical benefits. *Am J Obstet Gynecol* **218**, S609-s618, doi:10.1016/j.ajog.2017.12.011  
527 (2018).
- 528 42 Boekel, J. *et al.* Multi-omic data analysis using Galaxy. *Nature Publishing Group* **33**, 137-139,  
529 doi:10.1038/nbt.3134 (2015).
- 530 43 Andrews, S. *FASTQC; a quality control tool for highthroughput sequence data*,  
531 <http://www.bioinformatics.babraham.ac.uk/projects/fastqc/> (2010).
- 532 44 Kruger, F. *TrimGalore! A tool to automate quality and adapter trimming for highthroughput*  
533 *sequencing*, [http://www.bioinformatics.babraham.ac.uk/projects/trim\\_galore/](http://www.bioinformatics.babraham.ac.uk/projects/trim_galore/) (2012).
- 534 45 Langmead, B. & Salzberg, S. L. Fast gapped-read alignment with Bowtie 2. *Nature Methods* **9**,  
535 357, doi:10.1038/nmeth.1923 (2012).
- 536 46 Liao, Y., Smyth, G. K. & Shi, W. featureCounts: an efficient general purpose program for  
537 assigning sequence reads to genomic features. *Bioinformatics* **30**, 923-930,  
538 doi:10.1093/bioinformatics/btt656 (2014).
- 539 47 Robinson, M. D., McCarthy, D. J. & Smyth, G. K. edgeR: a Bioconductor package for differential  
540 expression analysis of digital gene expression data. *Bioinformatics* **26**, 139-140,  
541 doi:10.1093/bioinformatics/btp616 (2009).
- 542 48 Robinson, M. D. & Oshlack, A. A scaling normalization method for differential expression  
543 analysis of RNA-seq data. *Genome Biology* **11**, doi:10.1186/gb-2010-11-3-r25 (2010).
- 544 49 Oliveros, J. *Venny. An interactive tool for comparing lists with Venn's diagrams.*,  
545 <http://bioinfogp.cnb.csic.es/tools/venny/index.html> (2007).
- 546 50 Mi, H. & Thomas, P. Vol. 563 123-140 (Humana Press, 2009).
- 547 51 Committe on Obstetric Practice American Institute of Ultrasound in Medicine society for  
548 Maternal-Fetal, M. in *Obstetrics and gynecology* Vol. 129 967-968 (2017).
- 549 52 Buhimschi, C. S. *et al.* Proteomic profiling of the amniotic fluid to detect inflammation, infection,  
550 and neonatal sepsis. *PLoS Medicine* **4**, 84-94,  
551 doi:papers3://publication/doi/10.1371/journal.pmed.0040018 (2007).
- 552 53 Committee on Practice Bulletins—Obstetrics, T. A. C. o. O. & Gynecologists. in *Obstetrics and*  
553 *gynecology* Vol. 120 964-973 (2012).
- 554 54 Buhimschi, I. A. *et al.* Multidimensional Proteomics Analysis of Amniotic Fluid to Provide Insight  
555 into the Mechanisms of Idiopathic Preterm Birth. *PLOS ONE* **3**, e2049-2011,  
556 doi:papers3://publication/doi/10.1371/journal.pone.0002049 (2008).
- 557

## 558 **Figure Legends**

559 **Figure 1: Normal and advanced villous maturation.** A-C) Representative micrographs of normal  
560 mature placental villi at term delivery (39.2-42.2 weeks), D-E) Representative micrographs of placental  
561 villi from intraamniotic infected placentas delivered (25.4-31.3 weeks). Perivillous fibrin deposition (blue  
562 arrows) was observed along with an increase in syncytial nuclear aggregates (green arrows). F-H)  
563 Representative micrographs of advanced villous maturation in idiopathic spontaneous preterm deliveries  
564 (36.6-36.1 weeks). Terminal villi were numerous along with an increase in the number of syncytial  
565 aggregates and vasculosyncytial membranes. Perivillous fibrin deposition was also observed. All images  
566 were captured at 20X magnification and scale bar = 100 $\mu$ m.

567

568 **Figure 2: A comparative approach to identifying molecular signatures of maturation and gestation.**  
569 Differentially expressed genes were identified using pairwise comparisons EdgeR. Red dots represent  
570 significant genes that have an absolute log<sub>2</sub> fold-change of 1.5 and Benjamini Hochberg adjusted P-value  
571 of <0.1. Blue lines represent log<sub>2</sub> fold-change of 1.5 and dotted line represents a raw P-value <0.05. B) A  
572 comparative analysis to identify genes categorized as gestational age, infection, and maturation. The Venn  
573 diagram represents the intersection of significant genes from Panel A pairwise comparisons IAI vs term  
574 n=160 total genes, isPTB vs IAI n=94 total genes, and isPTB vs term n=158 total genes. Genes categorized  
575 as infection (n=37) are represented in the intersection of IAI vs term and isPTB vs term. Gestational age  
576 genes (total n= 123) are represented by the intersection of IAI vs term and isPTB vs term (n=11) and the  
577 IAI vs term genes exclusive to IAI vs term (blue shaded area). Villous Maturation genes (total n= 186)  
578 are represented by the intersection of isPTB vs IAI (n=18) and the genes exclusive to isPTB v IAI shaded  
579 in yellow (n=39) and isPTB vs term shaded in green (n=158). C) Identification of candidate genes for  
580 maturation and gestational age. We compared genes with significant differential expression across all  
581 three pairwise comparisons to identify candidate genes with differential expression in isPTB and term  
582 compared to IAI but with no change or the opposite expression pattern in isPTB compared to term

583 (maturation signal) or with a minimal expression difference between isPTB compared to term (maturation  
584 drivers). Gestational age candidates were identified by comparing isPTB and IAI samples to term.  
585 Differences observed in isPTB compared to IAI are likely due to the overall differences in gestational age  
586 (Table 1).

587  
588 **Figure 3: Identification of isPTB specific genes.** We compared genes with significant differential  
589 expression across all three pairwise comparisons to identify candidate genes with differential expression  
590 in isPTB compared to term and IAI and with the either the opposite expression pattern or no change in  
591 expression in term v IAI. 104 genes met this criteria and are shown in heatmaps.

592  
593 **Figure 4: Placental tissue in isPTB demonstrates increased DKK1 and IGFBP1 expression.** DKK1  
594 and IGFBP demonstrate localization the syncytiotrophoblast in the control term births with increased  
595 expression in isPTB. Images are taken at 40x magnification and scale bar = 50 $\mu$ m

596

597

598

599

600

601

602

603

604

605

606

607



Table 1: Clinical characteristics of the placental villous samples included in this study

| Characteristics                      | Intra-Amniotic Inection Births (IAI Births) | Idiopathic Spontaneous Preterm Births (isPTB) | Term Births      | P-values             |
|--------------------------------------|---------------------------------------------|-----------------------------------------------|------------------|----------------------|
| <b>Number of samples</b>             | 5                                           | 12                                            | 14               |                      |
| <b>Maternal Age</b>                  | 35(21-41)                                   | 28(18-39)                                     | 31 (19-37)       | NS <sup>1</sup>      |
| <b>Gravidity</b>                     | 3(2-5)                                      | 2(1-5)                                        | 2(1-3)           | 0.058 <sup>1</sup>   |
| <b>Parity</b>                        | 1(0-4)                                      | 1(0-2)                                        | 2(0-5)           | NS <sup>1</sup>      |
| <b>Gestational Age</b>               | 26(25-31)**                                 | 33(29-36)*                                    | 39(38-42)        | <0.0001 <sup>1</sup> |
| <b>Fetal sex (% female)</b>          | 5(100%)                                     | 6(50%)                                        | 7(50%)           | NS <sup>2</sup>      |
| <b>Fetal weight (grams)</b>          | 830(680-1830)**                             | 2062(1450-2722)*                              | 3505 (3360-4690) | <0.0001 <sup>1</sup> |
| <b>Birth weight percentile</b>       | 44(1-60)                                    | 33(3-60)*                                     | 72(40-99)        | 0.0008 <sup>1</sup>  |
| <b>SGA %</b>                         | 20%                                         | 16.6%                                         | 0                |                      |
| <b><u>Delivery type</u></b>          |                                             |                                               |                  |                      |
| <b>Cesarean (%)</b>                  | 2(40%)                                      | 5(41.7%)                                      | 7(50%)           | NS <sup>2</sup>      |
| <b>Vaginal (%)</b>                   | 3(60%)                                      | 7(58.3%)                                      | 7(50%)           |                      |
| <b>Infection Status (% Positive)</b> | 5(100%)*                                    | 0(0%)                                         | 1(7%)            | <0.005 <sup>2</sup>  |

<sup>1</sup>Kruskal-Wallis Test ANOVA with Dunn's Multiple Comparisons <sup>2</sup>Fisher's Exact Test

\*P<0.005 \*\*P<0.0001 vs Term Births Abbreviations: SGA Small for gestational age, NS Not significant

Table 2: Morphological assessment of placental villous samples

|                                        | IAI Births(n=5) | isPTB (n=11)   | Term Births (n=14) | P-value |
|----------------------------------------|-----------------|----------------|--------------------|---------|
| SNA/pf (range)                         | 0.7(0.4-1.15)   | 1.03(0.4-2.45) | 1.29(0.25-2.2)     | 0.093   |
| Total termial Villi <80um (range)      | 58(46-96)       | 103(57-126)    | 102(44-157)        | 0.078   |
| Vasculo-syncytial membranes/hpf(range) | 0.59(0.1-1.35)* | 2.02(0.45-5.1) | 3.86(1.45-10)      | 0.0010  |

Kruskal-Wallis Test ANOVA with Dunn's Multiple Comparisons \*P<0.005

Abbreviations: isPTB idiopathic spontaneous preterm birth



Table 3: Candidate genes associated with advanced villous maturity in isPTB

| Gene symbol         | Description                                                   | Log2 Fold Change <sup>1</sup> | Adjusted P-value* |
|---------------------|---------------------------------------------------------------|-------------------------------|-------------------|
| <b>Signal Genes</b> |                                                               |                               |                   |
| <i>KRT24</i>        | keratin 24                                                    | 10.38                         | 0.0891            |
| <i>KRT6A</i>        | keratin 6A                                                    | 7.76                          | 0.0931            |
| <i>ZBED2</i>        | zinc finger BED-type containing 2                             | 5.63                          | 0.0850            |
| <i>AVPR1A</i>       | arginine vasopressin receptor 1A                              | 4.91                          | 0.0977            |
| <i>MPZL2</i>        | myelin protein zero like 2                                    | 3.69                          | 0.0677            |
| <i>TEKT2</i>        | tektin 2                                                      | 3.44                          | 0.0783            |
| <i>CDH2</i>         | cadherin 2                                                    | 3.15                          | 0.0505            |
| <i>OR2T10</i>       | olfactory receptor family 2 subfamily T member 10             | 2.63                          | 0.0846            |
| <i>HTRA4</i>        | HtrA serine peptidase 4                                       | 2.24                          | 0.0432            |
| <i>S100A2</i>       | S100 calcium binding protein A2                               | 2.12                          | 0.0704            |
| <i>SLC5A9</i>       | solute carrier family 5 member 9                              | -1.54                         | 0.0934            |
| <i>HPSE2</i>        | heparanase 2 (inactive)                                       | -1.57                         | 0.0353            |
| <i>PGLYRP1</i>      | peptidoglycan recognition protein 1                           | -1.62                         | 0.0575            |
| <i>ZNF560</i>       | zinc finger protein 560                                       | -1.70                         | 0.0633            |
| <i>C2orf40</i>      | chromosome 2 open reading frame 40                            | -1.73                         | 0.0850            |
| <i>HTR1B</i>        | 5-hydroxytryptamine receptor 1B                               | -1.75                         | 0.0018            |
| <i>GPR12</i>        | G protein-coupled receptor 12                                 | -1.87                         | 0.0926            |
| <i>AMELX</i>        | amelogenin, X-linked                                          | -1.91                         | 0.0989            |
| <i>SCG2</i>         | secretogranin II                                              | -1.99                         | 0.0353            |
| <i>DNAAF3</i>       | dynein axonemal assembly factor 3                             | -2.04                         | 0.0894            |
| <i>CRABP1</i>       | cellular retinoic acid binding protein 1                      | -2.12                         | 0.0999            |
| <b>Driver genes</b> |                                                               |                               |                   |
| <i>SHISAL1</i>      | shisa like 1                                                  | 5.20                          | 0.0856            |
| <i>FGFBP1</i>       | fibroblast growth factor binding protein 1                    | 5.05                          | 0.0821            |
| <i>ICOS</i>         | inducible T cell costimulator                                 | 4.61                          | 0.0835            |
| <i>CYP7B1</i>       | cytochrome P450 family 7 subfamily B member 1                 | 4.59                          | 0.0298            |
| <i>HOXD10</i>       | homeobox D10                                                  | 4.58                          | 0.0516            |
| <i>SLC16A9</i>      | solute carrier family 16 member 9                             | 3.54                          | 0.0977            |
| <i>TNFRSF18</i>     | TNF receptor superfamily member 18                            | 3.32                          | 0.0935            |
| <i>MGST1</i>        | microsomal glutathione S-transferase 1                        | 2.80                          | 0.0374            |
| <i>FOSL1</i>        | FOS like 1, AP-1 transcription factor subunit                 | 2.77                          | 0.0902            |
| <i>SPOCK1</i>       | SPARC/osteonectin, cwcv and kazal like domains proteoglycan 1 | 2.38                          | 0.0483            |
| <i>KHDC1</i>        | KH domain containing 1                                        | -1.51                         | 0.0298            |
| <i>CYP4F12</i>      | cytochrome P450 family 4 subfamily F member 12                | -1.79                         | 0.0560            |
| <i>ANKRD30A</i>     | ankyrin repeat domain 30A                                     | -2.16                         | 0.0435            |
| <i>LAMP5</i>        | lysosomal associated membrane protein family member 5         | -4.49                         | 0.0516            |

<sup>1</sup> Values from the isPTB verses IAI comparison \*Benjamini Hochberg correction for multiple comparisons

Table 4: Candidate genes specific to isPTB

| <b>Gene symbol</b> | <b>Description</b>                                                                                        | <b>Log2 Fold Change<sup>1</sup></b> | <b>Adjusted P-value*</b> |
|--------------------|-----------------------------------------------------------------------------------------------------------|-------------------------------------|--------------------------|
| <i>PAEP</i>        | progesterone associated endometrial protein                                                               | 7.28                                | 0.00001                  |
| <i>IGFBP1</i>      | insulin like growth factor binding protein 1                                                              | 6.17                                | 0.00006                  |
| <i>RORB</i>        | RAR related orphan receptor B                                                                             | 6.15                                | 0.00001                  |
| <i>NDP</i>         | NDP, norrin cystine knot growth factor                                                                    | 5.80                                | 0.00001                  |
| <i>CHRD1</i>       | chordin like 1                                                                                            | 5.75                                | 0.00013                  |
| <i>PRL</i>         | prolactin                                                                                                 | 5.68                                | 0.00003                  |
| <i>SCGB1D2</i>     | secretoglobin family 1D member 2                                                                          | 5.66                                | 0.03211                  |
| <i>JCHAIN</i>      | joining chain of multimeric IgA and IgM                                                                   | 5.18                                | 0.00067                  |
| <i>EPYC</i>        | epiphycan                                                                                                 | 4.88                                | 0.00143                  |
| <i>GSTA1</i>       | glutathione S-transferase alpha 1                                                                         | 4.65                                | 0.02587                  |
| <i>LBP</i>         | lipopolysaccharide binding protein                                                                        | 4.63                                | 0.00787                  |
| <i>HEPH</i>        | hephaestin                                                                                                | 4.62                                | 0.00012                  |
| <i>UGT2B7</i>      | UDP glucuronosyltransferase family 2 member B7                                                            | 4.49                                | 0.04936                  |
| <i>FOXL2NB</i>     | FOXL2 neighbor                                                                                            | 4.16                                | 0.00582                  |
| <i>PIGR</i>        | polymeric immunoglobulin receptor                                                                         | 4.12                                | 0.02485                  |
| <i>FGB</i>         | fibrinogen beta chain                                                                                     | 4.06                                | 0.04506                  |
| <i>RXFPI</i>       | relaxin/insulin like family peptide receptor 1<br>family with sequence similarity 19 member A4, C-C motif | 4.02                                | 0.00010                  |
| <i>FAM19A4</i>     | chemokine like                                                                                            | 3.97                                | 0.00582                  |
| <i>DIRAS2</i>      | DIRAS family GTPase 2                                                                                     | 3.93                                | 0.01842                  |
| <i>RBP4</i>        | retinol binding protein 4                                                                                 | 3.92                                | 0.00017                  |
| <i>GNLY</i>        | granulysin                                                                                                | 3.91                                | 0.00004                  |
| <i>SCARA5</i>      | scavenger receptor class A member 5                                                                       | 3.90                                | 0.00006                  |
| <i>MEDAG</i>       | mesenteric estrogen dependent adipogenesis                                                                | 3.87                                | 0.00004                  |
| <i>CXCL9</i>       | C-X-C motif chemokine ligand 9                                                                            | 3.78                                | 0.04135                  |
| <i>PLA2G2D</i>     | phospholipase A2 group IID                                                                                | 3.72                                | 0.07457                  |
| <i>PDZK1IP1</i>    | PDZK1 interacting protein 1                                                                               | 3.62                                | 0.00087                  |
| <i>LRRN4CL</i>     | LRRN4 C-terminal like                                                                                     | 3.60                                | 0.00045                  |
| <i>ITGAD</i>       | integrin subunit alpha D                                                                                  | 3.46                                | 0.00036                  |
| <i>CNRI</i>        | cannabinoid receptor 1                                                                                    | 3.43                                | 0.00086                  |
| <i>IGFBP6</i>      | insulin like growth factor binding protein 6                                                              | 3.40                                | 0.00522                  |
| <i>WT1</i>         | Wilms tumor 1                                                                                             | 3.37                                | 0.00143                  |
| <i>CSF3</i>        | colony stimulating factor 3                                                                               | 3.35                                | 0.01058                  |
| <i>PRUNE2</i>      | prune homolog 2                                                                                           | 3.23                                | 0.00080                  |
| <i>CDHR1</i>       | cadherin related family member 1                                                                          | 3.19                                | 0.03039                  |
| <i>RELN</i>        | reelin                                                                                                    | 3.12                                | 0.01473                  |
| <i>FAM19A5</i>     | family with sequence similarity 19 member A5, C-C motif chemokine like                                    | 3.02                                | 0.07215                  |
| <i>DRAXIN</i>      | dorsal inhibitory axon guidance protein                                                                   | 2.96                                | 0.07852                  |

|                |                                                                  |      |         |
|----------------|------------------------------------------------------------------|------|---------|
| <i>CD2</i>     | CD2 molecule                                                     | 2.94 | 0.01984 |
| <i>BRINP2</i>  | BMP/retinoic acid inducible neural specific 2                    | 2.93 | 0.00820 |
| <i>KLRC1</i>   | killer cell lectin like receptor C1                              | 2.93 | 0.00582 |
| <i>CLIC6</i>   | chloride intracellular channel 6                                 | 2.87 | 0.09012 |
| <i>NTRK1</i>   | neurotrophic receptor tyrosine kinase 1                          | 2.87 | 0.01134 |
| <i>KCND2</i>   | potassium voltage-gated channel subfamily D member 2             | 2.84 | 0.03211 |
| <i>SLPI</i>    | secretory leukocyte peptidase inhibitor                          | 2.82 | 0.00396 |
| <i>RASD1</i>   | ras related dexamethasone induced 1                              | 2.71 | 0.00448 |
| <i>GZMB</i>    | granzyme B                                                       | 2.61 | 0.00287 |
| <i>MMP1</i>    | matrix metalloproteinase 1                                       | 2.61 | 0.05125 |
| <i>MAG</i>     | myelin associated glycoprotein                                   | 2.60 | 0.09009 |
| <i>NCAM1</i>   | neural cell adhesion molecule 1                                  | 2.58 | 0.00889 |
| <i>WDR72</i>   | WD repeat domain 72                                              | 2.57 | 0.04582 |
| <i>MZB1</i>    | marginal zone B and B1 cell specific protein                     | 2.56 | 0.05713 |
| <i>POU2AF1</i> | POU class 2 associating factor 1                                 | 2.56 | 0.04936 |
| <i>EOMES</i>   | eomesodermin                                                     | 2.55 | 0.01473 |
| <i>SLC18A2</i> | solute carrier family 18 member A2                               | 2.54 | 0.03211 |
| <i>BHMT2</i>   | betaine--homocysteine S-methyltransferase 2                      | 2.54 | 0.00787 |
| <i>CP</i>      | ceruloplasmin                                                    | 2.54 | 0.00582 |
| <i>ADCY1</i>   | adenylate cyclase 1                                              | 2.54 | 0.00186 |
| <i>GPR174</i>  | G protein-coupled receptor 174                                   | 2.50 | 0.01830 |
| <i>GZMA</i>    | granzyme A                                                       | 2.49 | 0.05337 |
| <i>IRF4</i>    | interferon regulatory factor 4                                   | 2.48 | 0.01734 |
| <i>EPDR1</i>   | ependymin related 1                                              | 2.48 | 0.00068 |
| <i>CD8A</i>    | CD8a molecule                                                    | 2.46 | 0.01699 |
| <i>GAS1</i>    | growth arrest specific 1                                         | 2.44 | 0.00004 |
| <i>COL4A4</i>  | collagen type IV alpha 4 chain                                   | 2.42 | 0.02472 |
| <i>TRPC4</i>   | transient receptor potential cation channel subfamily C member 4 | 2.38 | 0.01393 |
| <i>GZMH</i>    | granzyme H                                                       | 2.37 | 0.03028 |
| <i>CD38</i>    | CD38 molecule                                                    | 2.36 | 0.00251 |
| <i>DUSP2</i>   | dual specificity phosphatase 2                                   | 2.35 | 0.01545 |
| <i>SH2D1A</i>  | SH2 domain containing 1A                                         | 2.33 | 0.09336 |
| <i>AADAC</i>   | arylacetamide deacetylase                                        | 2.32 | 0.04506 |
| <i>RAMP1</i>   | receptor activity modifying protein 1                            | 2.32 | 0.00010 |
| <i>LEFTY2</i>  | left-right determination factor 2                                | 2.31 | 0.05736 |
| <i>GLB1L2</i>  | galactosidase beta 1 like 2                                      | 2.28 | 0.00881 |
| <i>LSAMP</i>   | limbic system-associated membrane protein                        | 2.28 | 0.04837 |
| <i>GBP5</i>    | guanylate binding protein 5                                      | 2.27 | 0.01393 |
| <i>TNFRSF8</i> | TNF receptor superfamily member 8                                | 2.24 | 0.00522 |
| <i>PCBP3</i>   | poly(rC) binding protein 3                                       | 2.24 | 0.01545 |
| <i>OMD</i>     | osteomodulin                                                     | 2.23 | 0.00186 |
| <i>DEFB1</i>   | defensin beta 1                                                  | 2.22 | 0.04506 |
| <i>FASLG</i>   | Fas ligand                                                       | 2.21 | 0.07457 |

|                 |                                                           |      |         |
|-----------------|-----------------------------------------------------------|------|---------|
| <i>ABLIM2</i>   | actin binding LIM protein family member 2                 | 2.20 | 0.01021 |
| <i>ARC</i>      | activity regulated cytoskeleton associated protein        | 2.20 | 0.06836 |
| <i>SPTBN4</i>   | spectrin beta, non-erythrocytic 4                         | 2.17 | 0.02472 |
| <i>SMOX</i>     | spermine oxidase                                          | 2.16 | 0.00068 |
| <i>DNASE1L3</i> | deoxyribonuclease 1 like 3                                | 2.16 | 0.05553 |
| <i>MAOB</i>     | monoamine oxidase B                                       | 2.15 | 0.01065 |
| <i>ITK</i>      | IL2 inducible T cell kinase                               | 2.14 | 0.01858 |
| <i>PLIN1</i>    | perilipin 1                                               | 2.12 | 0.01545 |
| <i>CSDC2</i>    | cold shock domain containing C2                           | 2.12 | 0.02278 |
| <i>CD248</i>    | CD248 molecule                                            | 2.12 | 0.01163 |
| <i>TMEM59L</i>  | transmembrane protein 59 like                             | 2.12 | 0.03746 |
| <i>SLFN12L</i>  | schlafen family member 12 like                            | 2.11 | 0.02239 |
| <i>C3</i>       | complement C3                                             | 2.11 | 0.00582 |
| <i>F2R</i>      | coagulation factor II thrombin receptor                   | 2.10 | 0.00010 |
| <i>CD3G</i>     | CD3g molecule                                             | 2.08 | 0.05553 |
| <i>UCHL1</i>    | ubiquitin C-terminal hydrolase L1                         | 2.07 | 0.02188 |
| <i>LCK</i>      | LCK proto-oncogene, Src family tyrosine kinase            | 2.05 | 0.00704 |
| <i>ABI3BP</i>   | ABI family member 3 binding protein                       | 2.05 | 0.00523 |
| <i>OXTR</i>     | oxytocin receptor                                         | 2.04 | 0.00134 |
| <i>C11orf96</i> | chromosome 11 open reading frame 96                       | 2.02 | 0.00522 |
| <i>TNFRSF9</i>  | TNF receptor superfamily member 9                         | 2.01 | 0.08424 |
| <i>PZP</i>      | PZP, alpha-2-macroglobulin like                           | 2.01 | 0.07355 |
| <i>SAMD3</i>    | sterile alpha motif domain containing 3                   | 2.01 | 0.02241 |
| <i>HSPB6</i>    | heat shock protein family B (small) member 6              | 1.99 | 0.00437 |
| <i>IKZF3</i>    | IKAROS family zinc finger 3                               | 1.99 | 0.00228 |
| <i>CTSW</i>     | cathepsin W                                               | 1.99 | 0.04227 |
| <i>ISLR</i>     | immunoglobulin superfamily containing leucine rich repeat | 1.98 | 0.00086 |
| <i>KCNB1</i>    | potassium voltage-gated channel subfamily B member 1      | 1.97 | 0.01593 |
| <i>SAXO2</i>    | stabilizer of axonemal microtubules 2                     | 1.96 | 0.03543 |
| <i>EGR3</i>     | early growth response 3                                   | 1.93 | 0.01977 |
| <i>RGS1</i>     | regulator of G protein signaling 1                        | 1.93 | 0.01858 |
| <i>THBS2</i>    | thrombospondin 2                                          | 1.92 | 0.08708 |
| <i>ALDH1A2</i>  | aldehyde dehydrogenase 1 family member A2                 | 1.92 | 0.00221 |
| <i>SLC47A1</i>  | solute carrier family 47 member 1                         | 1.92 | 0.02583 |
| <i>SH2D2A</i>   | SH2 domain containing 2A                                  | 1.87 | 0.04419 |
| <i>PTGIS</i>    | prostaglandin I2 synthase                                 | 1.84 | 0.07949 |
| <i>MAATS1</i>   | MYCBP associated and testis expressed 1                   | 1.84 | 0.00413 |
| <i>SCML4</i>    | Scm polycomb group protein like 4                         | 1.83 | 0.04554 |
| <i>HSD11B1</i>  | hydroxysteroid 11-beta dehydrogenase 1                    | 1.81 | 0.02188 |
| <i>KCNH1</i>    | potassium voltage-gated channel subfamily H member 1      | 1.80 | 0.05341 |
| <i>CHST2</i>    | carbohydrate sulfotransferase 2                           | 1.75 | 0.00522 |
| <i>IGFBP2</i>   | insulin like growth factor binding protein 2              | 1.74 | 0.02723 |
| <i>KCNQ3</i>    | potassium voltage-gated channel subfamily Q member 3      | 1.74 | 0.01473 |

|               |                                                               |       |         |
|---------------|---------------------------------------------------------------|-------|---------|
| <i>RUNX3</i>  | runt related transcription factor 3                           | 1.73  | 0.03062 |
| <i>TNC</i>    | tenascin C                                                    | 1.71  | 0.05109 |
| <i>PRDM1</i>  | PR/SET domain 1                                               | 1.71  | 0.00582 |
| <i>ZAP70</i>  | zeta chain of T cell receptor associated protein kinase 70    | 1.70  | 0.05856 |
| <i>ADRA2C</i> | adrenoceptor alpha 2C                                         | 1.70  | 0.04135 |
| <i>CD7</i>    | CD7 molecule                                                  | 1.68  | 0.04030 |
| <i>SSC5D</i>  | scavenger receptor cysteine rich family member with 5 domains | 1.67  | 0.05461 |
| <i>FNDC4</i>  | fibronectin type III domain containing 4                      | 1.67  | 0.00303 |
| <i>EHF</i>    | ETS homologous factor                                         | 1.66  | 0.01964 |
| <i>SPHK1</i>  | sphingosine kinase 1                                          | 1.64  | 0.02634 |
| <i>ESPNL</i>  | espin like                                                    | 1.63  | 0.09012 |
| <i>CPXMI</i>  | carboxypeptidase X, M14 family member 1                       | 1.59  | 0.02587 |
| <i>LIF</i>    | LIF, interleukin 6 family cytokine                            | 1.57  | 0.09012 |
| <i>ATOH8</i>  | atonal bHLH transcription factor 8                            | 1.53  | 0.02543 |
| <i>FHOD3</i>  | formin homology 2 domain containing 3                         | 1.53  | 0.06551 |
| <i>ERICH5</i> | glutamate rich 5                                              | -1.53 | 0.08983 |
| <i>GABRB1</i> | gamma-aminobutyric acid type A receptor beta1 subunit         | -1.60 | 0.00921 |

<sup>1</sup> Values from the isPTB verses term comparison \*Benjamini Hochberg correction for multiple comparisons

Table 5: Enrichment analyses for isPTB candidate genes

| <b>Reactome pathways</b>                                                                                                                   | <b>Fold Enrichment</b> | <b>Raw P-value</b> | <b>Adjusted P-value<sup>1</sup></b> | <b>Genes</b>                                                                                                                                                                          |
|--------------------------------------------------------------------------------------------------------------------------------------------|------------------------|--------------------|-------------------------------------|---------------------------------------------------------------------------------------------------------------------------------------------------------------------------------------|
| Regulation of Insulin-like Growth Factor (IGF) transport and uptake by Insulin-like Growth Factor Binding Proteins (IGFBPs) (R-HSA-381426) | 35.28                  | 7.41E-07           | 1.47E-03                            | <i>MMP1, IGFBP6, IGFBP1, IGFBP2, GZMH</i>                                                                                                                                             |
| <b>GO cellular component complete</b>                                                                                                      | <b>Fold Enrichment</b> | <b>Raw P-value</b> | <b>Adjusted P-value<sup>1</sup></b> | <b>Genes</b>                                                                                                                                                                          |
| T cell receptor complex (GO:0042101)                                                                                                       | 23.4                   | 4.14E-04           | 4.33E-02                            | <i>CD8A, ZAP70, CD3G</i>                                                                                                                                                              |
| immunological synapse (GO:0001772)                                                                                                         | 17.43                  | 1.20E-04           | 1.70E-02                            | <i>LCK, GZMB, GZMA, ZAP70</i>                                                                                                                                                         |
| plasma membrane raft (GO:0044853)                                                                                                          | 8.8                    | 8.46E-05           | 1.29E-02                            | <i>TRPC4, PTGIS, CD8A, FASLG, F2R, KCND2</i>                                                                                                                                          |
| membrane microdomain (GO:0098857)                                                                                                          | 5.83                   | 1.57E-06           | 5.21E-04                            | <i>LCK, TRPC4, PTGIS, CD8A, CNR1, ARC, FASLG, ZAP70, MAG, F2R, ADCY1, KCND2</i>                                                                                                       |
| membrane raft (GO:0045121)                                                                                                                 | 5.83                   | 1.57E-06           | 4.46E-04                            | <i>LCK, TRPC4, PTGIS, CD8A, CNR1, ARC, FASLG, ZAP70, MAG, F2R, ADCY1, KCND2</i>                                                                                                       |
| membrane region (GO:0098589)                                                                                                               | 5.63                   | 2.24E-06           | 5.56E-04                            | <i>LCK, TRPC4, PTGIS, CD8A, CNR1, ARC, FASLG, ZAP70, MAG, F2R, ADCY1, KCND2</i>                                                                                                       |
| extracellular matrix (GO:0031012)                                                                                                          | 5.08                   | 6.14E-06           | 1.11E-03                            | <i>LEFTY2, CD248, OMD, NCAM1, THBS2, NDP, MMP1, TNC, SLPI, SSC5D, ABI3BP, COL4A4</i>                                                                                                  |
| <b>GO molecular function complete</b>                                                                                                      | <b>Fold Enrichment</b> | <b>Raw P-value</b> | <b>Adjusted P-value<sup>1</sup></b> | <b>Genes</b>                                                                                                                                                                          |
| signaling receptor binding (GO:0005102)                                                                                                    | 2.46                   | 8.44E-06           | 3.93E-02                            | <i>LEFTY2, CSF3, DEFB1, LCK, LBP, CLIC6, FGB, NDP, GABRB1, CD8A, CD2, CXCL9, LIF, PRL, IGFBP6, C3, IGFBP1, ADRA2C, NTRK1, FASLG, IGFBP2, ITK, MAG, RELN, CD3G, UCHL1, F2R, JCHAIN</i> |
| <b>GO biological process complete</b>                                                                                                      | <b>Fold Enrichment</b> | <b>Raw P-value</b> | <b>Adjusted P-value<sup>1</sup></b> | <b>Genes</b>                                                                                                                                                                          |
| programmed cell death involved in cell development (GO:0010623)                                                                            | 49.39                  | 6.21E-05           | 1.86E-02                            | <i>DNASE1L3, NTRK1, FASLG</i>                                                                                                                                                         |

|                                                       |       |          |          |                                                       |
|-------------------------------------------------------|-------|----------|----------|-------------------------------------------------------|
| regulation of norepinephrine secretion (GO:0014061)   | 26.15 | 3.09E-04 | 4.83E-02 | <i>OTXR, KCNB1, ADRA2C</i>                            |
| positive regulation of vasoconstriction (GO:0045907)  | 22.45 | 5.30E-06 | 2.85E-03 | <i>CD38, FGB, OXTR, ADRA2C, F2R</i>                   |
| alpha-beta T cell differentiation (GO:0046632)        | 15.12 | 3.06E-05 | 1.09E-02 | <i>ITK, ZAP70, EOMES, IRF4, PLA2G2D</i>               |
| antibacterial humoral response (GO:0019731)           | 14.82 | 2.13E-04 | 3.83E-02 | <i>DEFB1, FGB, SLPI, JCHAIN</i>                       |
| cellular defense response (GO:0006968)                | 12.77 | 6.48E-05 | 1.91E-02 | <i>GNLY, LBP, CXCL9, SH2D1A, ITK</i>                  |
| alpha-beta T cell activation (GO:0046631)             | 12.56 | 7.00E-05 | 1.92E-02 | <i>ITK, ZAP70, EOMES, IRF4, PLA2G2D</i>               |
| positive regulation of blood circulation (GO:1903524) | 10.58 | 1.49E-04 | 3.29E-02 | <i>CD38, FGB, OTXR, ADRA2C, F2R</i>                   |
| regulation of vasoconstriction (GO:0019229)           | 10.44 | 1.59E-04 | 3.36E-02 | <i>CD38, FGB, OXTR, ADRA2C, F2R</i>                   |
| response to retinoic acid (GO:0032526)                | 9.69  | 1.19E-05 | 5.30E-03 | <i>RBP4, RORB, BRINP2, CD38, TNC, IGFBP2, ALKDHA2</i> |

<sup>1</sup>Fishers Exact test with Bonferroni correction for multiple comparisons

Figure 1

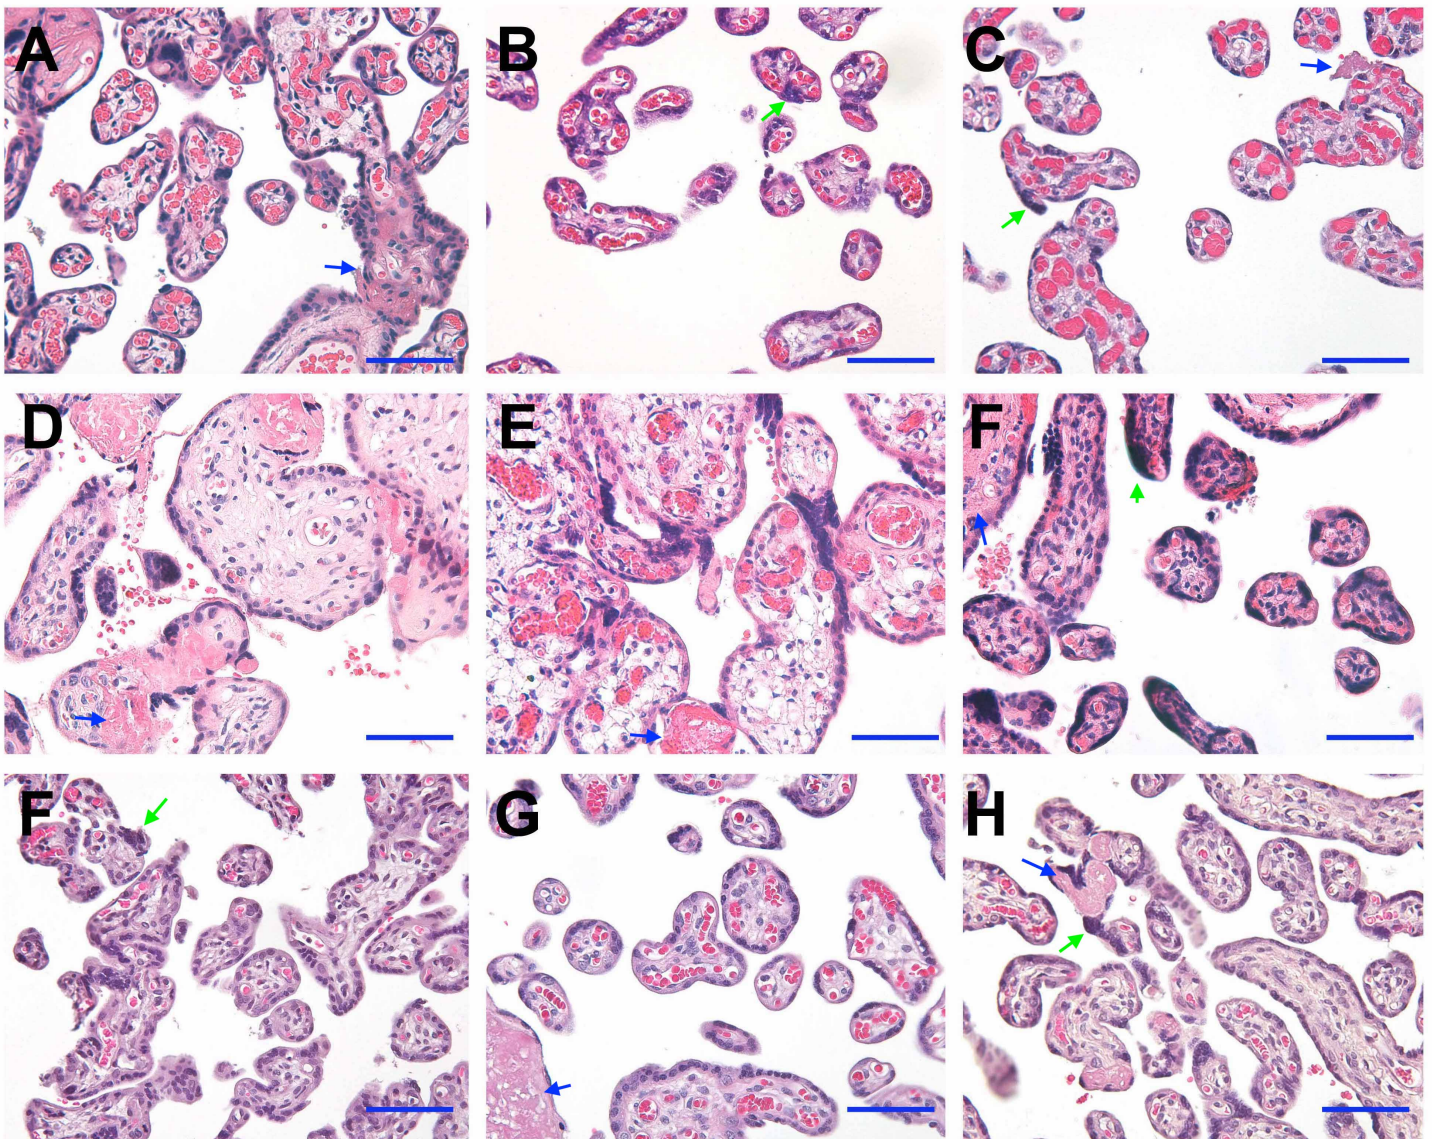



Figure 2

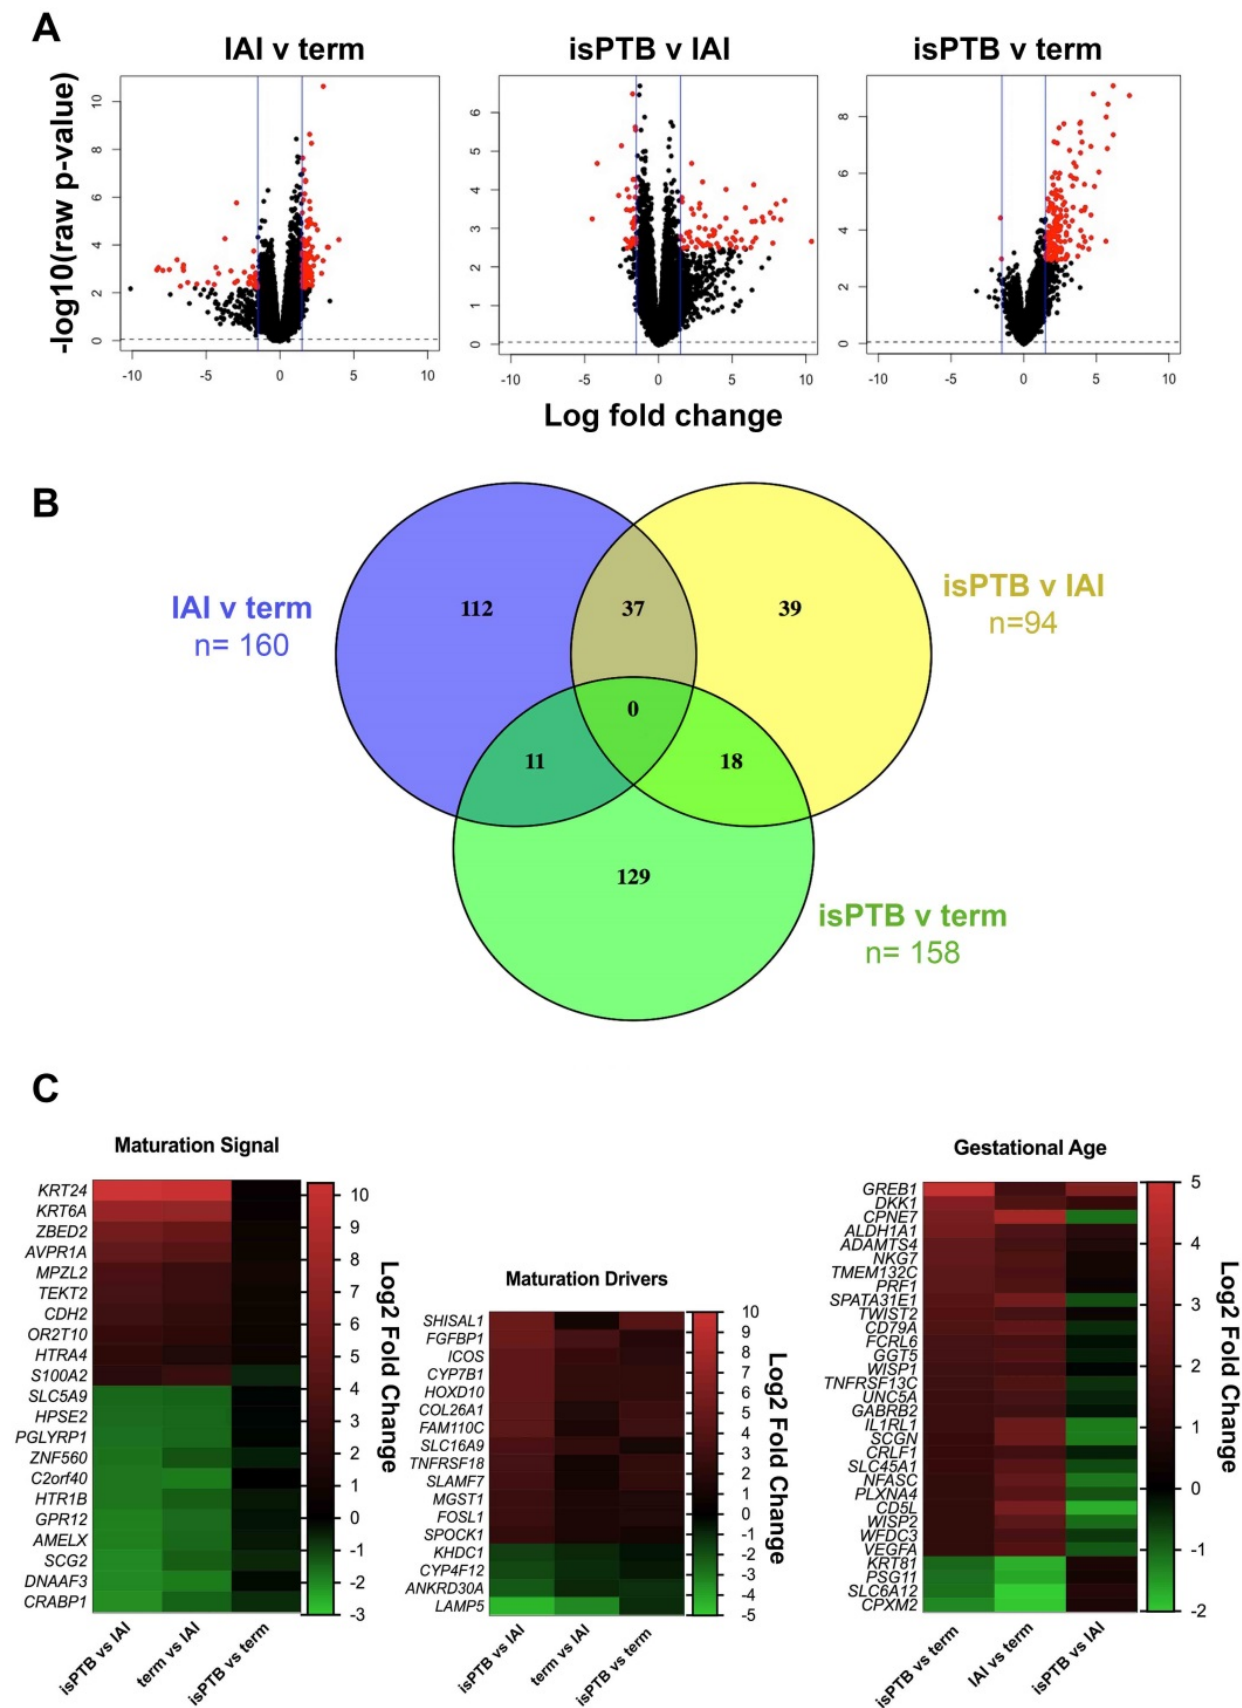

Figure 3

### isPTB specific genes

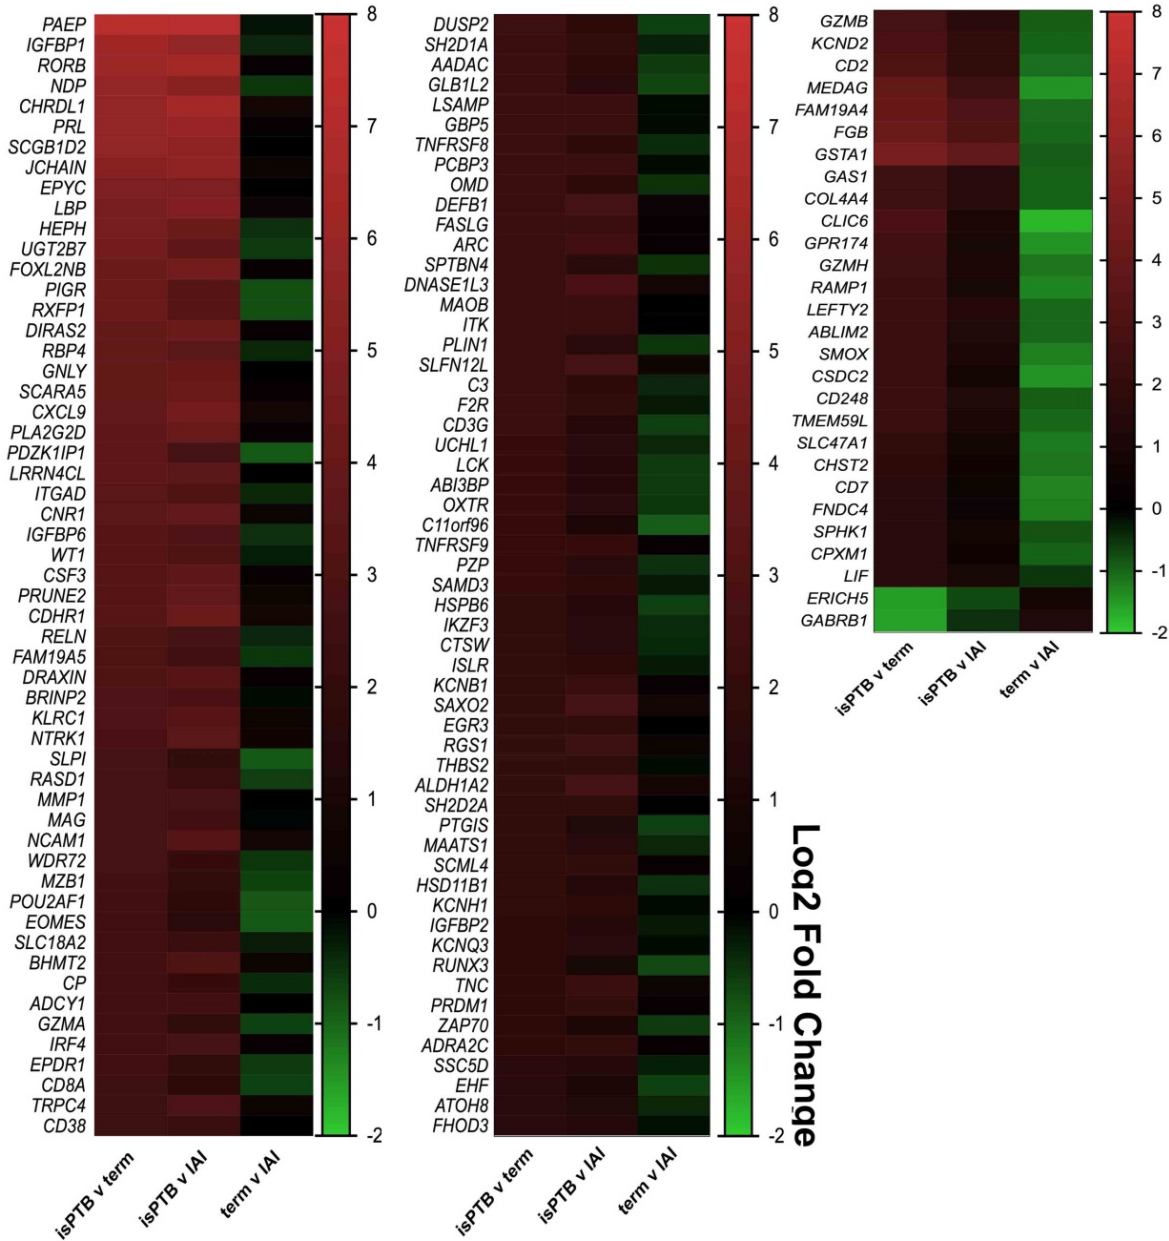

Figure 4

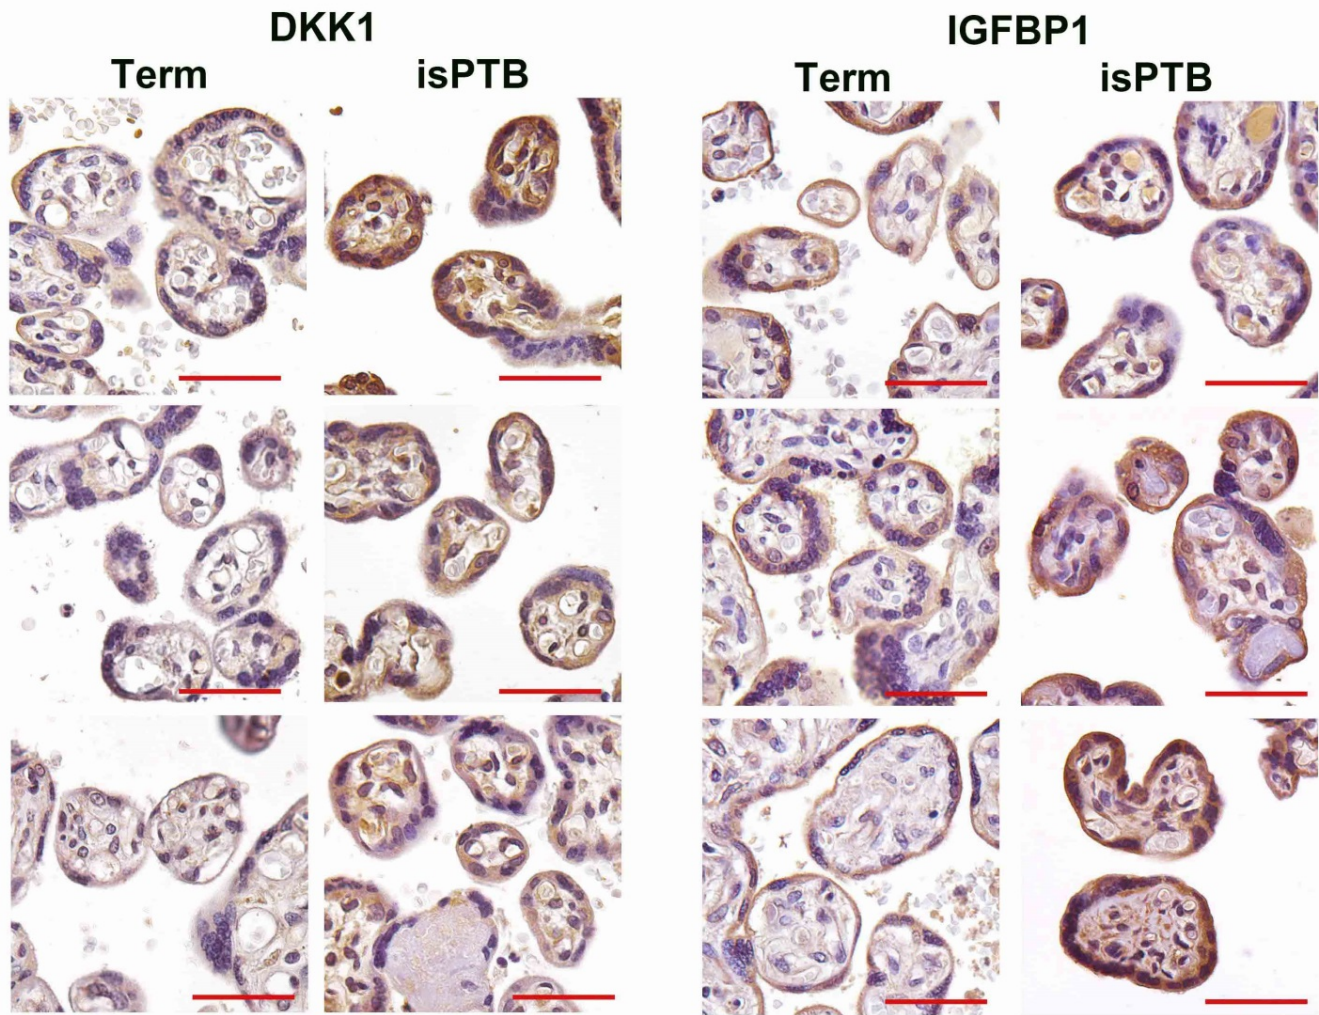

Source: http://biorxiv.org/content/10.1101/386185v1.full.pdf
